# Supplementary material for: Single-Voxel Proton Magnetic Resonance Spectroscopy of the Thalamus in Idiopathic Epileptic Dogs and in Healthy Control Dogs
Source: PubMed Central journal article supplement (PMC9302964; doi:10.3389/fvets.2022.885044), 2022-07-07
Supplement: Table_2.pdf [file Table_2.pdf]

**Supplementary table S2: Metabolite concentration ratios to total Creatine**

|               | Control (n=12) |           | Case (n=9)  |           | Treated (n=9) |           |
|---------------|----------------|-----------|-------------|-----------|---------------|-----------|
|               | <i>Mean</i>    | <i>SD</i> | <i>Mean</i> | <i>SD</i> | <i>Mean</i>   | <i>SD</i> |
| <b>tCho</b>   | 0.36           | 0.05      | 0.35        | 0.06      | 0.33          | 0.06      |
| <b>%CRLB</b>  | 4              | 0.7       | 4.4         | 0.9       | 3.3           | 0.5       |
| <b>tNAA</b>   | 1.21           | 0.17      | 1.21        | 0.11      | 1.1           | 0.14      |
| <b>%CRLB</b>  | 4.4            | 0.7       | 4.3         | 1         | 3.9           | 0.8       |
| <b>mI+Gly</b> | 1.18           | 0.11      | 1.11        | 0.11      | 1.17          | 0.1       |
| <b>%CRLB</b>  | 4.8            | 0.9       | 5           | 1.2       | 3.8           | 1.1       |
| <b>NAA</b>    | 1.02           | 0.13      | 1.01        | 0.17      | 0.91          | 0.07      |
| <b>%CRLB</b>  | 5.2            | 0.8       | 5.6         | 1.4       | 5             | 1.1       |
| <b>Glx</b>    | 1.78           | 0.22      | 1.81        | 0.15      | 1.57          | 0.21      |
| <b>%CRLB</b>  | 7.6            | 1.1       | 7.3         | 1.1       | 7.1           | 1.6       |
| <b>mI</b>     | 1.01           | 0.12      | 0.89        | 0.17      | 0.98          | 0.14      |
| <b>%CRLB</b>  | 9.1            | 3.3       | 11.2        | 3.3       | 7.8           | 3.3       |
| <b>Glu</b>    | 1.33           | 0.19      | 1.3         | 0.11      | 1.16          | 0.24      |
| <b>%CRLB</b>  | 9.1            | 1.7       | 9.3         | 1.7       | 8.9           | 2.5       |
| <b>Gln</b>    | 0.45           | 0.08      | 0.51        | 0.15      | 0.4           | 0.15      |
| <b>%CRLB</b>  | 26.1           | 3.9       | 24          | 4.4       | 26.4          | 8.2       |

|               |       |       |       |       |       |       |
|---------------|-------|-------|-------|-------|-------|-------|
| <b>Asp</b>    | 0.46  | 0.13  | 0.48  | 0.12  | 0.44  | 0.09  |
| <b>%CRLB</b>  | 29.2  | 15.2  | 25.9  | 9     | 24.2  | 7.5   |
| <b>NAAG</b>   | 0.19  | 0.07  | 0.2   | 0.09  | 0.18  | 0.08  |
| <b>%CRLB</b>  | 30.8  | 14.6  | 29.3  | 12.5  | 28.4  | 15.6  |
| <b>GSH</b>    | 0.18  | 0.1   | 0.19  | 0.05  | 0.13  | 0.05  |
| <b>%CRLB</b>  | 36.6  | 26.8  | 27.9  | 6.1   | 35.3  | 16.7  |
| <b>GABA</b>   | 0.16  | 0.05  | 0.14  | 0.08  | 0.14  | 0.07  |
| <b>%CRLB</b>  | 51.1  | 17.9  | 60.6  | 20.3  | 60    | 29.3  |
| <b>Asc</b>    | 0.48  | 0.21  | 0.46  | 0.07  | 0.5   | 0.09  |
| <b>%CRLB</b>  | 102.2 | 282.6 | 22.4  | 6     | 17.3  | 5.4   |
| <b>Scyllo</b> | 0.03  | 0.02  | 0.02  | 0.02  | 0.02  | 0.02  |
| <b>%CRLB</b>  | 136.8 | 274   | 251.6 | 378.1 | 182.3 | 314   |
| <b>Glc</b>    | 0.17  | 0.12  | 0.17  | 0.05  | 0.18  | 0.06  |
| <b>%CRLB</b>  | 155.8 | 290.9 | 41.6  | 23.3  | 33.3  | 12.9  |
| <b>PE</b>     | 0.32  | 0.25  | 0.19  | 0.1   | 0.24  | 0.13  |
| <b>%CRLB</b>  | 160.4 | 301.2 | 173.8 | 312.2 | 151.3 | 319   |
| <b>Gly</b>    | 0.17  | 0.16  | 0.22  | 0.12  | 0.2   | 0.14  |
| <b>%CRLB</b>  | 246.8 | 364.7 | 58.1  | 32.9  | 165.9 | 323   |
| <b>Lac</b>    | 0.09  | 0.1   | 0.03  | 0.04  | 0.06  | 0.06  |
| <b>%CRLB</b>  | 453.2 | 482.1 | 565.8 | 421   | 316.2 | 393.6 |

|              |       |       |       |       |       |       |
|--------------|-------|-------|-------|-------|-------|-------|
| <b>Tau</b>   | 0.05  | 0.07  | 0.04  | 0.05  | 0.03  | 0.02  |
| <b>%CRLB</b> | 557.7 | 470.2 | 594   | 480.4 | 486.7 | 400.7 |
| <b>Ala</b>   | 0.03  | 0.04  | 0.06  | 0.06  | 0.06  | 0.05  |
| <b>%CRLB</b> | 587.9 | 434.2 | 410.9 | 447.3 | 391.4 | 456.9 |

Legend: tCho: total choline; CRLB: Cramér Rao lower bounds; tNAA: total N-acetyl aspartate; mI: myoinositol; Gly: glycine; NAA: N-acetyl aspartate; Glx: glutamate-glutamine complex; Glu: glutamate; Gln: glutamine; Asp: aspartate; NAAG: N-acetylaspartylglutamate; GSH: glutathione; GABA: gamma-amino-butyrate; Asc: ascorbate; Scyllo: scyllo-inositol; Glc: glucose; PE: phosphoethanolamine; Lac: lactate; Tau: taurine; Ala: alanine.
